# Supplementary material for: Identifying distinct profiles of impulsivity for the four facets of psychopathy
Source: PLOS journal article supplement (doi:10.1371/journal.pone.0283866), 2023-04-14
Supplement: S20 (10.1371/journal.pone.0283866.s020) [file journal.pone.0283866.s020.pdf]

**S19 Table. Multivariate Dominance Analysis Predicting All Four Facets of Psychopathy.**

|                         | 1 | 2   | 3   | 4   | 5   | 6   | 7   | 8   | $P^2$ | $R^2$ | Rank |
|-------------------------|---|-----|-----|-----|-----|-----|-----|-----|-------|-------|------|
| 1 Positive Urgency      | - | 0.5 | 1   | 1   | 1   | 1   | 1   | 1   | .03   | .12   | 1    |
| 2 General Impulsivity   |   | -   | 0.5 | 1   | 1   | 1   | 1   | 1   | .03   | .11   | 2    |
| 3 Sensation Seeking     |   |     | -   | 0.5 | 0.5 | 0.5 | 1   | 1   | .01   | .04   | 3    |
| 4 Commission Errors     |   |     |     | -   | 0.5 | 0.5 | 0.5 | 1   | .02   | .02   | 4    |
| 5 Negative Urgency      |   |     |     |     | -   | 0.5 | 0.5 | 0.5 | .02   | .08   | 5    |
| 6 Lack of Premeditation |   |     |     |     |     | -   | 0.5 | 0.5 | .01   | .04   | 5    |
| 7 Delay Discounting     |   |     |     |     |     |     |     | 0.5 | .01   | .02   | 5    |
| 8 Decision Quality      |   |     |     |     |     |     |     | -   | .01   | .01   | 5    |

*Notes.* A value of 1 indicates complete dominance of the row variable over the column variable,

0.5 indicates that complete dominance could not be established (e.g., conditional dominance) and

a value of 0 indicated complete dominance of the column variable over the row variable.  $R^2$  and

$P^2$  indicate the average contribution of each predictor across all subset models.
